# Supplementary material for: Kinetics and New Mechanism of Azoxystrobin Biodegradation by an Ochrobactrum anthropi Strain SH14
Source: PubMed Central journal article supplement (PMC7284741; doi:10.3390/microorganisms8050625), 2020-04-26
Supplement: microorganisms-08-00625-s001.pdf [file microorganisms-08-00625-s001.pdf]

# **Kinetics and new mechanism of azoxystrobin biodegradation by an *Ochrobactrum anthropi* strain SH14**

Yanmei Feng<sup>1,2</sup>, Wenping Zhang<sup>1,2</sup>, Shimei Pang<sup>1,2</sup>, Ziqiu Lin<sup>1,2</sup>, Yuming Zhang<sup>1,2</sup>,

Yaohua Huang<sup>1,2</sup>, Pankaj Bhatt<sup>1,2</sup> and Shaohua Chen<sup>1,2\*</sup>

*<sup>1</sup>State Key Laboratory for Conservation and Utilization of Subtropical Agro-bioresources, Guangdong Province Key Laboratory of Microbial Signals and Disease Control, Integrative Microbiology Research Centre, South China Agricultural University, Guangzhou 510642, China;*

*<sup>2</sup>Guangdong Laboratory for Lingnan Modern Agriculture, Guangzhou 510642, China*

## **\*Corresponding author**

Shaohua Chen

South China Agricultural University, Guangzhou 510642, China

Tel: +86-20-8528 8229

Fax: +86-20-8528 0292

E-mail: shchen@scau.edu.cn

**a**

Abundance

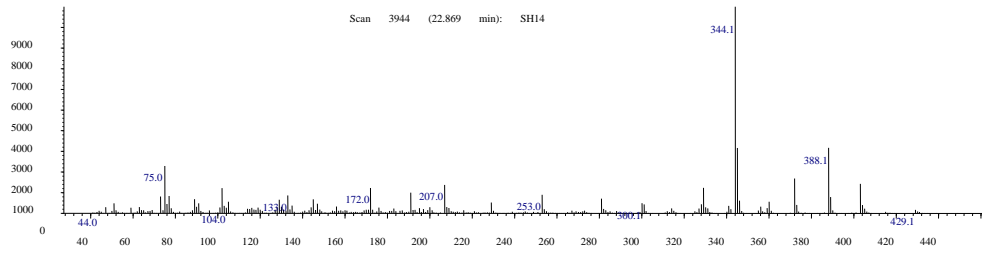

m/z-  
Abundance

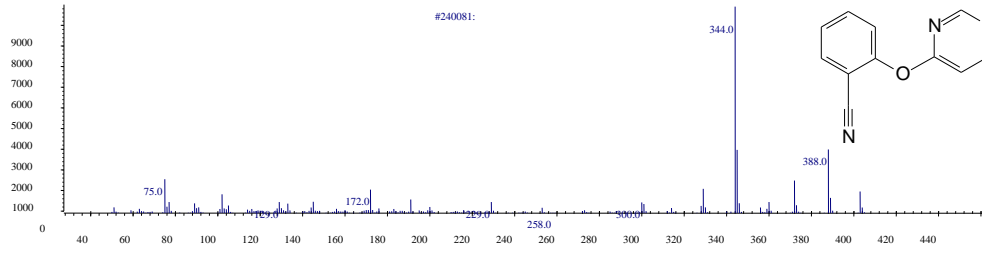

m/z-

**b**

Abundance

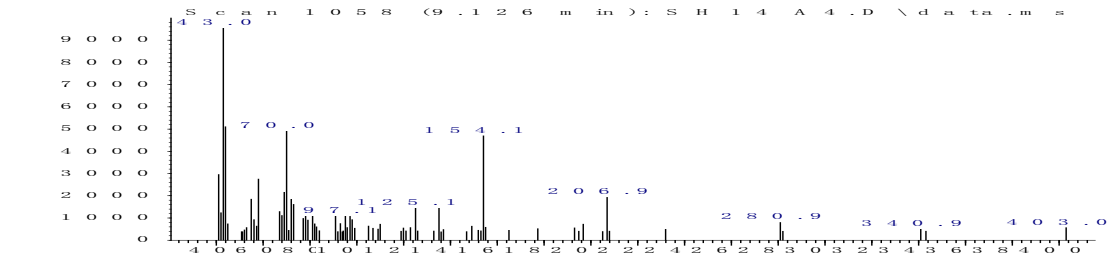

m / z -->  
Abundance

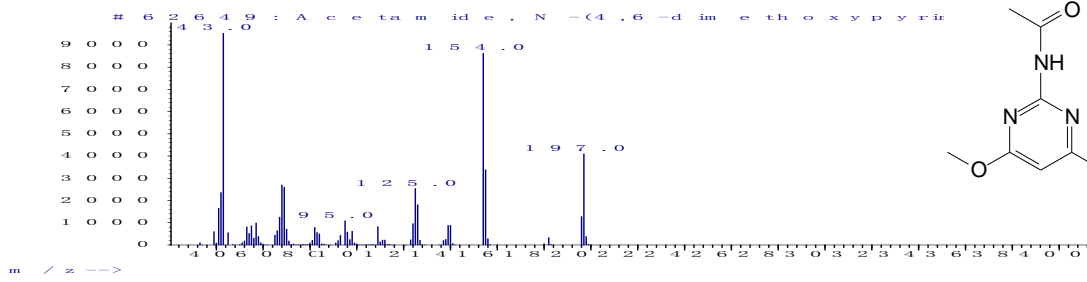

m / z -->

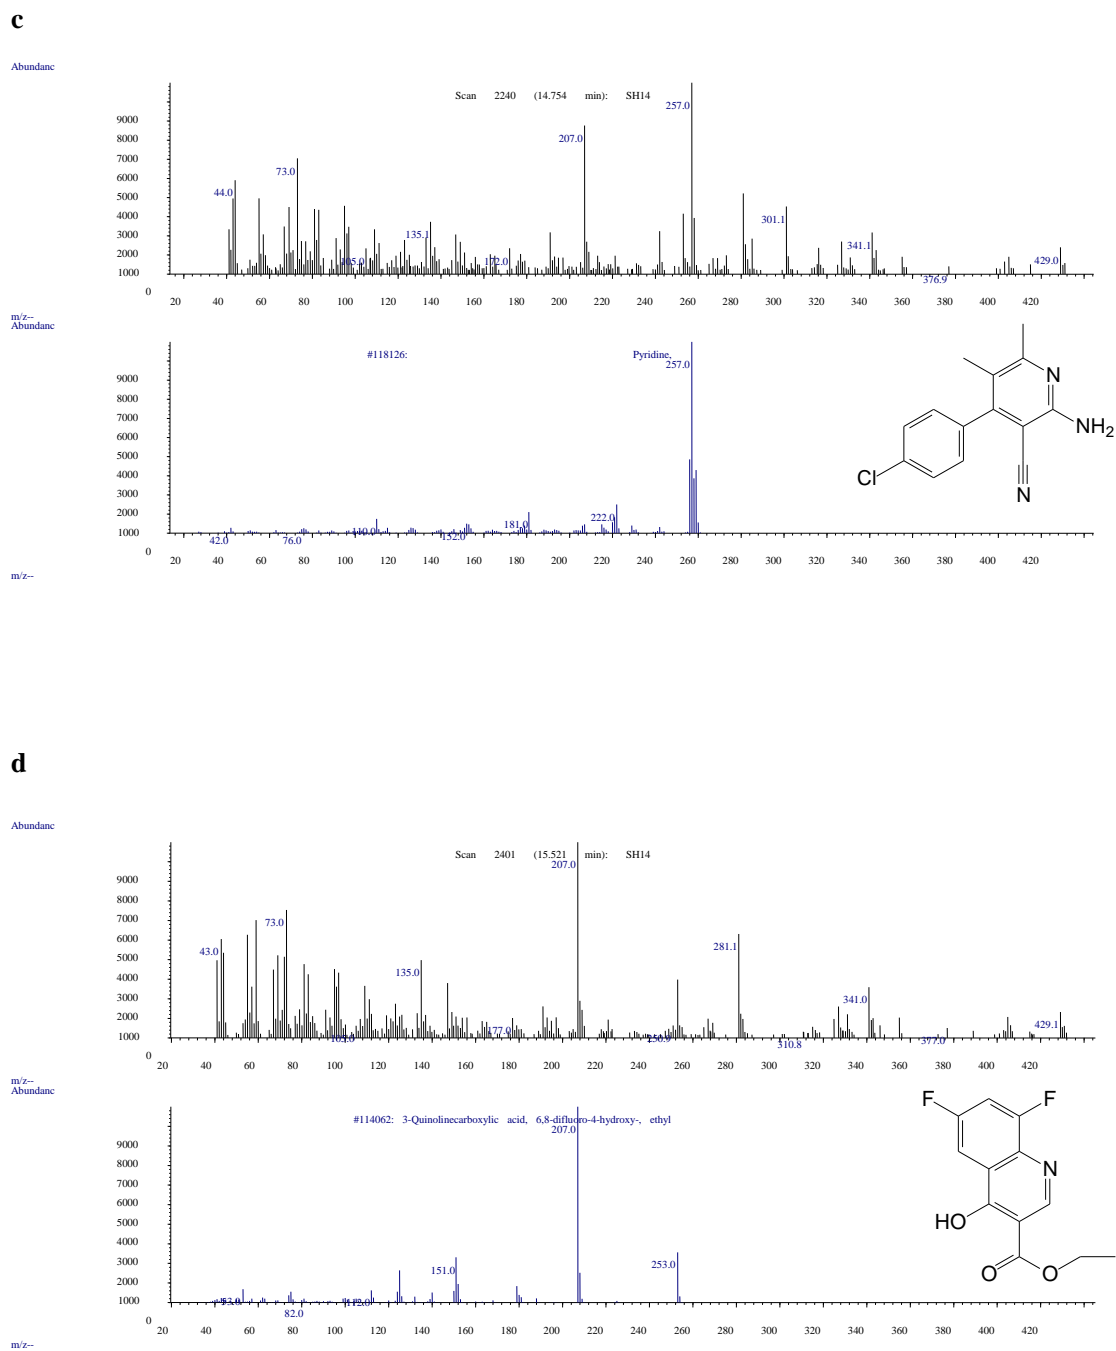

**Figure S1.** Gas chromatography–mass spectrometry (GC-MS) analysis of the metabolites produced during azoxystrobin degradation by strain SH14. (a–d) Characteristic ions of compounds (A–D). Retention time of each compound was noted as 22.869, 9.126, 14.754 and 15.521 min, respectively and were identified as (a) azoxystrobin; (b) *N*-(4,6-dimethoxypyrimidin-2-yl)-acetamide; (c) 2-amino-4-(4-chlorophenyl)-3-cyano-5,6-dimethyl-pyridine; (d) 3-quinolinecarboxylic acid, 6,8-difluoro-4-hydroxy-, ethyl ester, respectively

**Table S1.** Analysis of variance (ANOVA) for the fitted quadratic polynomial model of azoxystrobin degradation by strain SH14.

| Source                        | DF | SS       | MS       | F Value  | P Level* |
|-------------------------------|----|----------|----------|----------|----------|
| X <sub>1</sub>                | 1  | 35.2795  | 35.2795  | 10.0001  | 0.0074   |
| X <sub>2</sub>                | 1  | 45.7476  | 45.7476  | 12.9681  | 0.0032   |
| X <sub>3</sub>                | 1  | 8.305    | 8.305    | 2.3542   | 0.0416   |
| X <sub>1</sub> X <sub>1</sub> | 1  | 2010.88  | 2010.88  | 570.0243 | 0.0001   |
| X <sub>1</sub> X <sub>2</sub> | 1  | 9.245    | 9.245    | 2.62068  | 0.0455   |
| X <sub>1</sub> X <sub>3</sub> | 1  | 0        | 0        | 0        | 1        |
| X <sub>2</sub> X <sub>2</sub> | 1  | 168.7994 | 168.7994 | 47.8496  | 0.0001   |
| X <sub>2</sub> X <sub>3</sub> | 1  | 3.38     | 3.38     | 0.9581   | 0.3455   |
| X <sub>3</sub> X <sub>3</sub> | 1  | 52.0429  | 52.0429  | 14.7526  | 0.002    |
| Model                         | 9  | 2320.06  | 257.7955 | 73.0773  | 0.0001   |
| Error                         | 13 | 45.8602  | 3.5277   |          |          |
| Total                         | 22 | 2366.02  |          |          |          |

Note:  $R^2=0.9806$ ,  $adj.R^2=0.9672$ . DF refers to degrees of freedom; SS refers to sum of sequences; MS refers to mean square. \*P Level less than 0.05 indicates that the model terms are significant.
